# Supplementary material
Source: HighWire-hosted journal article supplement (http://cmajopen.ca/highwire/filestream/80744/field_highwire_adjunct_files/0/open-2013-0040-1-at.pdf)
Supplement: open-2013-0040-1-at.pdf [file open-2013-0040-1-at.pdf]

Appendix 1 (as supplied by authors): Members of the clinical working group

| <i>Clinical Working Group Member</i> | <i>Position</i>                                                                                                                                                                     | <i>Special Area of Content Interest</i>                                                                                       |
|--------------------------------------|-------------------------------------------------------------------------------------------------------------------------------------------------------------------------------------|-------------------------------------------------------------------------------------------------------------------------------|
| <i>Ms. R. Barrett</i>                | Prevention Practitioner (Registered Nurse)                                                                                                                                          | Evidence-based shared decision making, motivational interviewing                                                              |
| <i>Ms. S. Bible</i>                  | Prevention Practitioner (Registered Nurse)                                                                                                                                          | Evidence-based shared decision making, motivational interviewing, diabetes care, smoking cessation                            |
| <i>Ms. S. Bell</i>                   | Centre for Effective Practice                                                                                                                                                       | Evidence-based guidelines, shared decision making tool development, project management                                        |
| <i>Dr. S. Buchman</i>                | Family physician, former Primary Care Lead Toronto Regional Cancer Program, Cancer Care Ontario, Assistant Professor, Dept. of Family and Community Medicine, University of Toronto | Family Medicine, cancer prevention, screening and care, quality improvement in primary care, palliative care                  |
| <i>Dr. D. Campbell-Scherer</i>       | Family physician & researcher, Associate Professor, Dept. of Family Medicine, University of Alberta                                                                                 | Family Medicine practice and research, evidence-based clinical practice guidelines, cardiovascular disease, obesity, diabetes |
| <i>Dr. A. Cave</i>                   | Family physician & researcher, Professor, Dept. of Family Medicine, University of Alberta                                                                                           | Respiratory disease, smoking cessation, Family Medicine practice and research                                                 |
| <i>Dr. J. Carroll</i>                | Sydney G Frankfort Chair in Family Medicine, Associate Professor, Department of Family & Community Medicine Mount Sinai Hospital, University of Toronto                             | Family history, hereditary cancers, Family Medicine practice and research                                                     |
| <i>Dr. S. Dunn</i>                   | Family physician, research director Family Practice Centre of Women's College Hospital, Associate Professor, Department of Family and Community Medicine, University of Toronto     | Family Medicine practice and research, cervical cancer                                                                        |
| <i>Ms. M. Dhaliwal</i>               | Prevention Practitioner (Licensed Practical Nurse)                                                                                                                                  | Preventive patient care                                                                                                       |
| <i>Dr. M. Forte</i>                  | Family physician, Assistant Professor, Department of Family and Community Medicine, University of Toronto                                                                           | Family medicine practice                                                                                                      |
| <i>Dr. M. Griever</i>                | Family physician, Assistant Professor, Department of Family and Community Medicine, University of Toronto                                                                           | Family Medicine practice and research, diabetes, quality improvement                                                          |
| <i>Dr. E. Grunfeld</i>               | Giblon Professor and Director,                                                                                                                                                      | Family Medicine research, cancer                                                                                              |

|                              |                                                                                                                                                                                                                                           |                                                                                                                                                                                      |
|------------------------------|-------------------------------------------------------------------------------------------------------------------------------------------------------------------------------------------------------------------------------------------|--------------------------------------------------------------------------------------------------------------------------------------------------------------------------------------|
|                              | Family Medicine Research Program, Dept. of Family and Community Medicine, University of Toronto & Ontario Institute for Cancer Research                                                                                                   | prevention, screening, management                                                                                                                                                    |
| <i>Ms. C. Harrison</i>       | Prevention Practitioner (Nurse Practitioner)                                                                                                                                                                                              | Evidence-based shared decision making, motivational interviewing, Family Medicine practice                                                                                           |
| <i>Dr. M. Kahan</i>          | Associate Professor, Department of Family and Community Medicine, University of Toronto                                                                                                                                                   | Primary care management of addiction                                                                                                                                                 |
| <i>Dr. D. Klein</i>          | Family physician & researcher, Associate Professor, Dept. of Family Medicine, University of Alberta                                                                                                                                       | Family Medicine practice and research, diabetes, cardiovascular disease, exercise interventions in primary care                                                                      |
| <i>Dr. C. Korownyk</i>       | Family physician & researcher, Assistant Professor, Dept. of Family Medicine, University of Alberta                                                                                                                                       | Family Medicine practice and research, guidelines, prevention and screening, cancer                                                                                                  |
| <i>Dr. P. Krueger</i>        | Associate Professor, Department of Family and Community Medicine, University of Toronto                                                                                                                                                   | Family Medicine practice and research, epidemiology                                                                                                                                  |
| <i>Ms. K. Lang-Robertson</i> | Librarian (MLIS), Centre for Effective Practice                                                                                                                                                                                           | Evidence searching, guideline development, information management                                                                                                                    |
| <i>Dr D. Manca</i>           | Family physician & researcher, (MD, MClSc) Associate Professor & Director of Research, Dept. of Family Medicine, University of Alberta, Clinical Director, Alberta Family Practice Research Network, Alberta College of Family Physicians | Family Medicine practice and research, electronic medical records, screening and primary prevention, cardiovascular disease, diabetes, cancer, program implementation and evaluation |
| <i>Dr. J. Meuser</i>         | Family Medicine practice and Director of Professional Development, Assistant Professor, Department of Family and Community Medicine, University of Toronto                                                                                | Family Medicine practice and quality improvement and innovation, medical director, Centre for Effective Practice                                                                     |
| <i>Ms. L. Radmonovich</i>    | Prevention Practitioner (Registered Nurse)                                                                                                                                                                                                | Evidence-based shared decision making, motivational interviewing                                                                                                                     |
| <i>Ms. J. Rogers</i>         | Director, Centre for Effective Practice                                                                                                                                                                                                   | Evidence-based guidelines, shared decision making tool development, project management                                                                                               |
| <i>Dr. G. Salvalaggio</i>    | Family physician & researcher, Assistant Professor, Dept. of Family Medicine, University of Alberta                                                                                                                                       | Family Medicine practice and research, addictions, underserved populations (social determinants of health, access, equity), mental health                                            |
| <i>Ms. L. Schaar</i>         | Prevention Practitioner (Registered Nurse)                                                                                                                                                                                                | Evidence-based shared decision making, motivational                                                                                                                                  |

|                      |                                                                                         |                                                                                                                                           |
|----------------------|-----------------------------------------------------------------------------------------|-------------------------------------------------------------------------------------------------------------------------------------------|
|                      |                                                                                         | interviewing                                                                                                                              |
| <i>Dr. L. Steele</i> | Assistant Professor, Department of Family and Community Medicine, University of Toronto | Family Medicine practice and research, addictions, underserved populations (social determinants of health, access, equity), mental health |
| <i>Ms. L. Vesik</i>  | Prevention Practitioner (Registered Dietician)                                          | Evidence-based shared decision making, motivational interviewing, dietician                                                               |
| <i>Ms. R. Wymer</i>  | Prevention Practitioner (Registered Nurse)                                              | Evidence-based shared decision making, motivational interviewing                                                                          |
